# Supplementary material for: GOSI9: UK Global Ocean and Sea Ice configurations
Source: Copernicus journal article supplement (doi:10.5194/gmd-18-377-2025), 2025-01-23
Supplement: Supplementary file 1 [file gmd-18-377-2025-supplement.pdf]

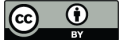

*Supplement of*

## **GOSI9: UK Global Ocean and Sea Ice configurations**

**Catherine Guiavarc’h et al.**

*Correspondence to:* Catherine Guiavarc’h ([catherine.guiavarch@metoffice.gov.uk](mailto:catherine.guiavarch@metoffice.gov.uk))

The copyright of individual parts of the supplement might differ from the article licence.

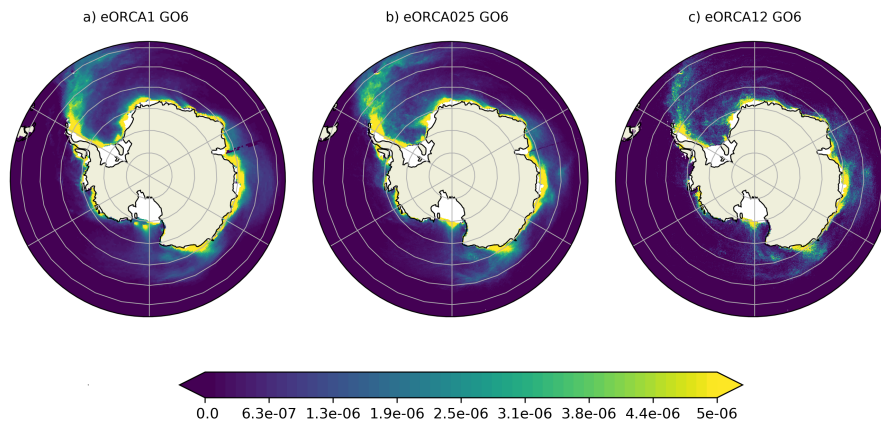

**Figure S1.** Annual mean of fresh water flux ( $\text{kg.m}^{-2}.\text{s}^{-1}$ ) from iceberg melt calculated from GO6 integrations.

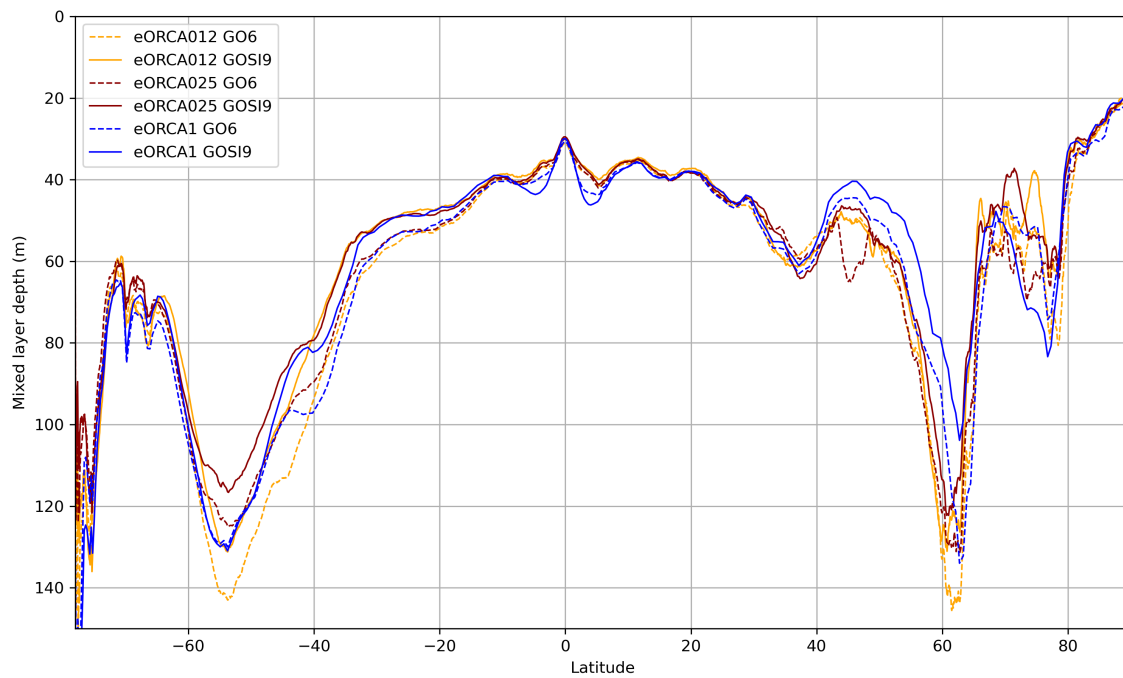

**Figure S2.** Zonal mean mixed layer depth for the third decade of integration (1995-2005) for the GOSI9 and the GO6 configurations.
